# Supplementary material
Source: PubMed Central journal article supplement (PMC9168833)

## ADOLESCENT BINGE-TYPE ETHANOL EXPOSURE SUPPRESS CHOLINERGIC TONE IN THE ORBITAL FRONTAL CORTEX

Adolescent Intermittent Ethanol (AIE)

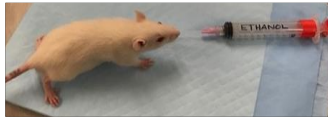

Control Gavage (CON)

Adult

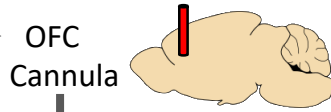

OFC Cannula

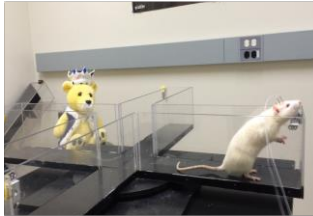

Adult Maze & Microdialysis

AIE ↓ cholinergic tone in the OFC

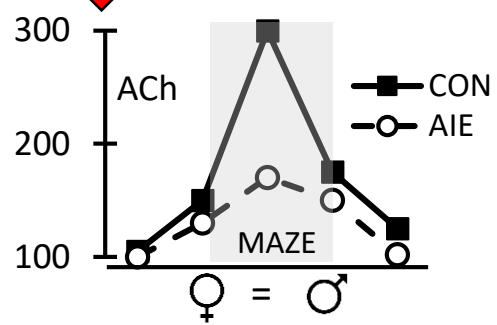

AIE ↑ dendritic branching

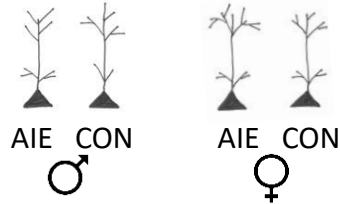

Supplement: NIHMS1809722-supplement-Visual_Abstract.pdf [file NIHMS1809722-supplement-Visual_Abstract.pdf]
